# Supplementary material for: Human Rabies by Secondary Transmission in Argentina, 2021
Source: MDPI journal article supplement (doi:10.3390/diseases10010017), 2022-03-18

Supplementary Figure S1. Timeline of a case of human rabies that occurred in the province of Buenos Aires, Argentina, 2021

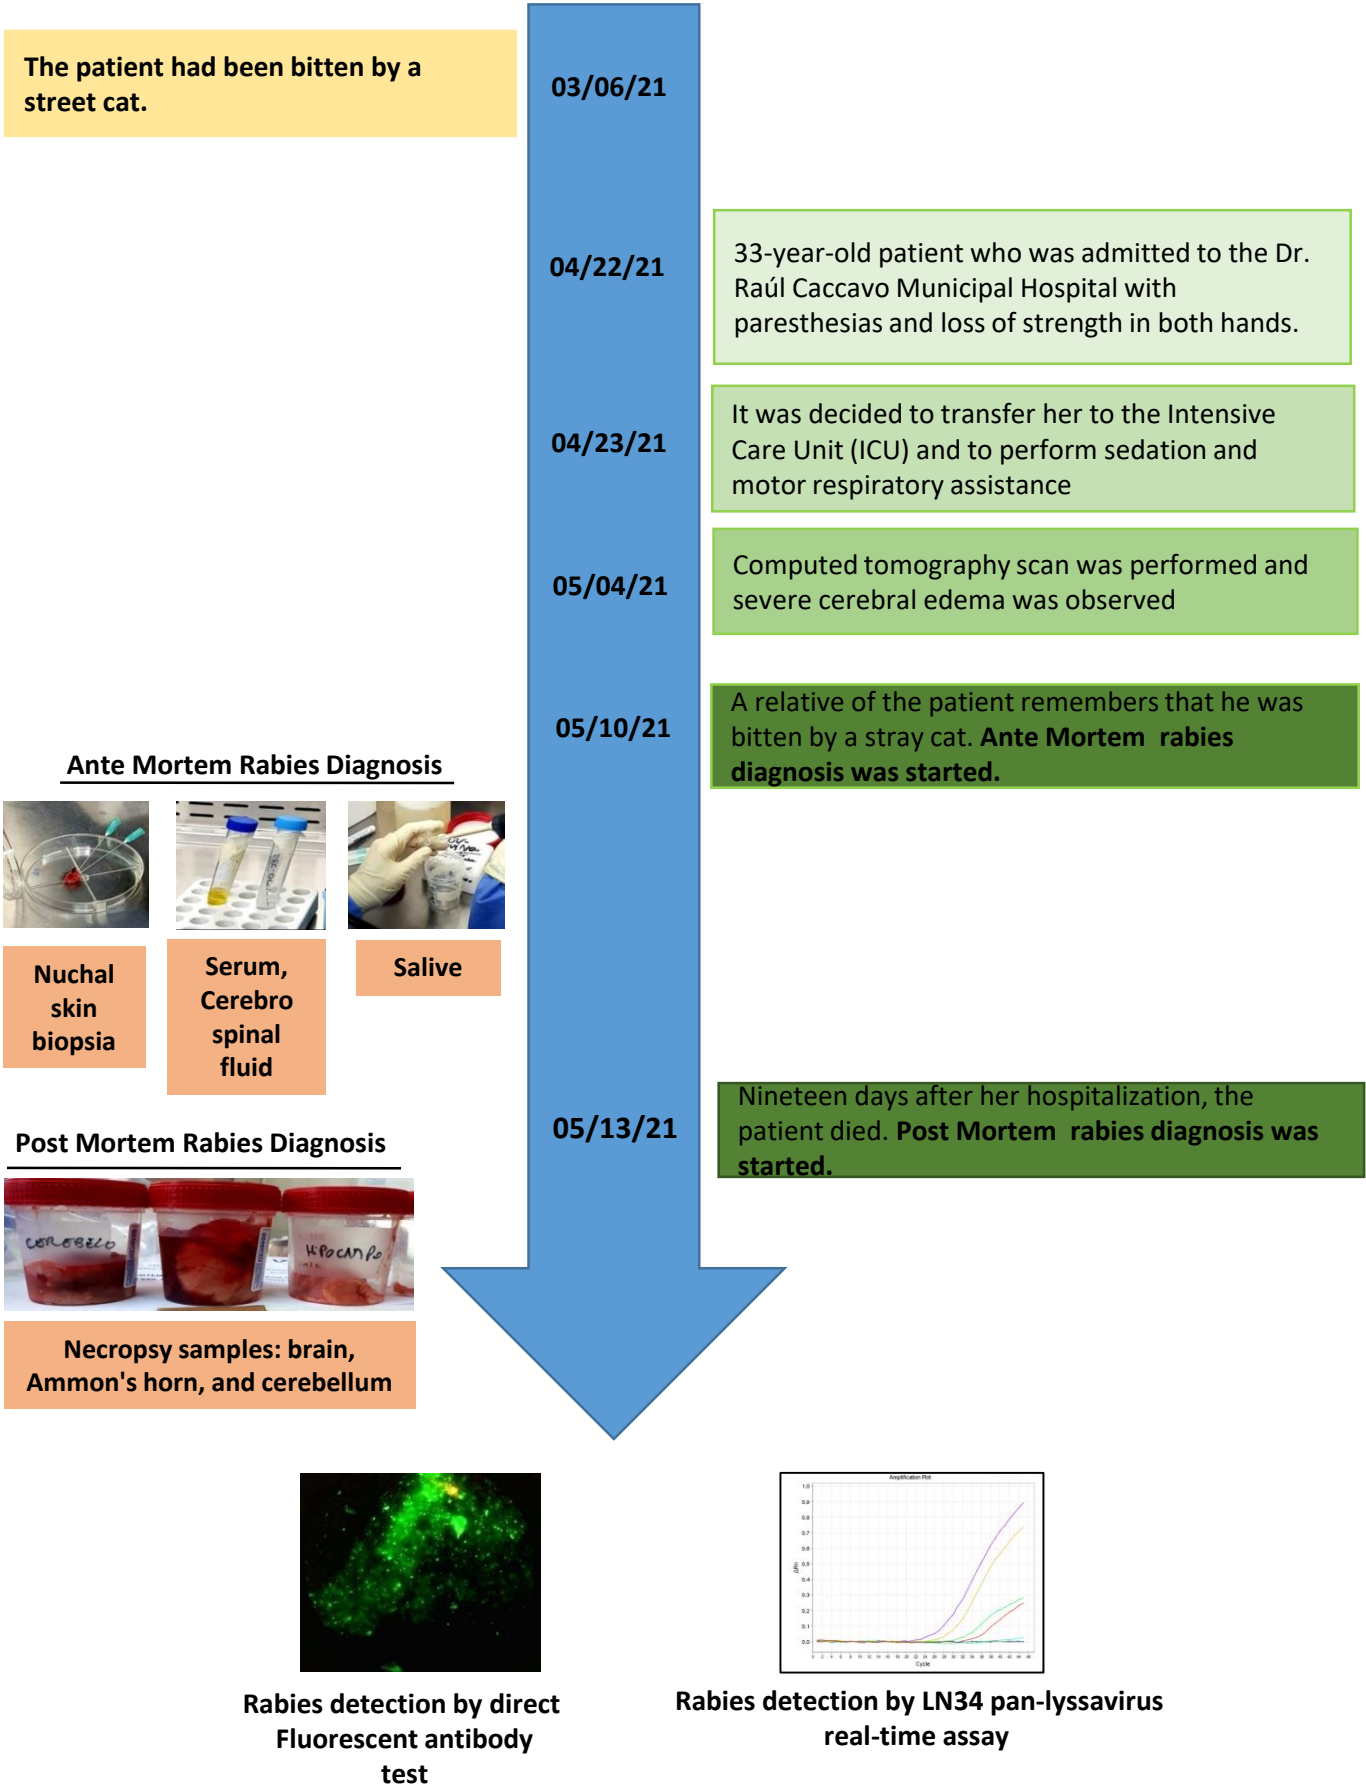

Supplement: s1 [file s1]
